# Supplementary material for: Circular RNA hsa_circ_0072309 inhibits the proliferation, invasion and migration of gastric cancer cells via inhibition of PI3K/AKT signaling by activating PPARγ/PTEN signaling
Source: PubMed Central journal article supplement — Mol Med Rep. 2021 Mar 11;23(5):349. doi: 10.3892/mmr.2021.11988 (PMC7974328; doi:10.3892/mmr.2021.11988), 2021-03-11

Figure S1. hsa\_circ\_0072309 overexpression inhibits the proliferation of gastric cancer cells via the peroxisome proliferator-activated receptor  $\gamma$ -dependent PTEN pathway. The viability of AGS cells in the six groups (control, Oe-circ\_0072309, Oe-circ\_0072309 + pioglitazone, Oe-circ\_0072309 + GW9662, pioglitazone + GW9662, Oe-circ\_0072309 + pioglitazone + GW9662) was determined using Cell Counting Kit-8 assays. \* $P < 0.05$ , \*\* $P < 0.01$ , \*\*\* $P < 0.001$ . circ, circular RNA; Oe, overexpression vector.

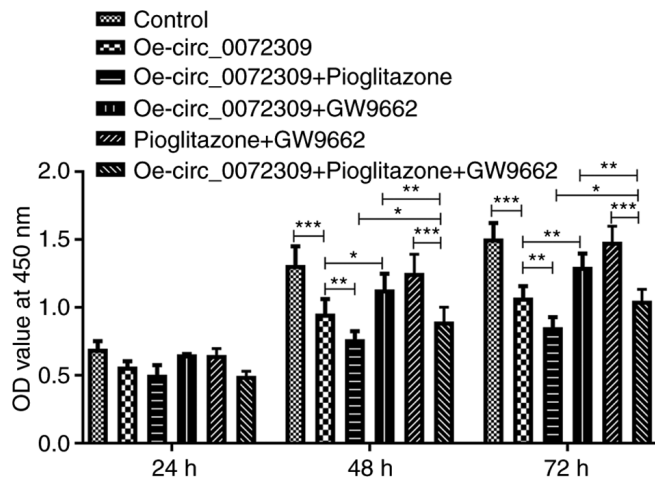

Supplement: Supplementary_Data.pdf [file Supplementary_Data.pdf]
